# Association of Psychotherapy with Disability Benefit Claim Closure among Patients Disabled Due to Depression

Shanil Ebrahim<sup>1,2\*</sup>, Gordon H. Guyatt<sup>1,3</sup>, Stephen D. Walter<sup>1</sup>, Diane Heels-Ansdell<sup>1</sup>, Marg Bellman<sup>4</sup>, Steven E. Hanna<sup>1</sup>, Irene Patelis-Siotis<sup>5</sup>, Jason W. Busse<sup>1,2</sup>

**1** Department of Clinical Epidemiology and Biostatistics, McMaster University, Hamilton, Ontario Canada, **2** Department of Anesthesia, McMaster University, Hamilton, Ontario, Canada, **3** Department of Medicine, McMaster University, Hamilton, Ontario, Canada, **4** National Disability Services, Policy & Procedure Department, Sun Life Financial, Toronto, Ontario, Canada, **5** Psychiatry & Behavioural Neurosciences, McMaster University, Hamilton, Ontario, Canada

## Abstract

**Background:** Depression is the most frequent reason for receiving disability benefits in North America, and treatment with psychotherapy is often funded by private insurers. No studies have explored the association between the provision of psychotherapy for depression and time to claim closure.

**Methods:** Using administrative data from a Canadian disability insurer, we evaluated the association between the provision of psychotherapy and short-term disability (STD) and long-term disability (LTD) claim closure by performing Cox proportional hazards regression.

**Results:** We analyzed 10,508 STD and 10,338 LTD claims for depression. In our adjusted analyses, receipt of psychotherapy was associated with longer time to STD closure (HR [99% CI] = 0.81 [0.68 to 0.97]) and faster LTD claim closure (1.42 [1.33 to 1.52]). In both STD and LTD, older age (0.90 [0.88 to 0.92] and 0.83 [0.80 to 0.85]), per decade, a primary diagnosis of recurrent depression versus non-recurrent major depression (0.78 [0.69 to 0.87] and 0.80 [0.72 to 0.89]), a psychological secondary diagnosis (0.90 [0.84 to 0.97] and 0.66 [0.61 to 0.71]), or a non-psychological secondary diagnosis (0.81 [0.73 to 0.90] and 0.77 [0.71 to 0.83]) versus no secondary diagnosis, and an administrative services only policy (0.94 [0.88 to 1.00] and 0.87 [0.75 to 0.996]) or refund policy (0.86 [0.80 to 0.92] and 0.73 [0.68 to 0.78]) compared to non-refund policy claims were independently associated with longer time to STD claim closure.

**Conclusions:** We found, paradoxically, that receipt of psychotherapy was independently associated with longer time to STD claim closure and faster LTD claim closure in patients with depression. We also found multiple factors that were predictive of time to both STD and LTD claim closure. Our study has limitations, and well-designed prospective studies are needed to establish the effect of psychotherapy on disabling depression.

**Citation:** Ebrahim S, Guyatt GH, Walter SD, Heels-Ansdell D, Bellman M, et al. (2013) Association of Psychotherapy with Disability Benefit Claim Closure among Patients Disabled Due to Depression. PLoS ONE 8(6): e67162. doi:10.1371/journal.pone.0067162

**Editor:** Marianna Mazza, Catholic University of Sacred Heart of Rome, Italy

**Received:** January 23, 2013; **Accepted:** May 14, 2013; **Published:** June 28, 2013

**Copyright:** © 2013 Ebrahim et al. This is an open-access article distributed under the terms of the Creative Commons Attribution License, which permits unrestricted use, distribution, and reproduction in any medium, provided the original author and source are credited.

**Funding:** The authors have no support or funding to report.

**Competing Interests:** The authors have read the journal's policy and have the following conflicts: Jason W. Busse acts as a consultant to Prisma Health Canada, a private incorporated company funded by employers and insurers that consults on and manages long-term disability claims. Marg Bellman is the assistant vice president of the National Disability Services, Policy & Procedure department at Sun Life Financial Assurance Company of Canada. This does not alter the authors' adherence to all the PLOS ONE policies on sharing data and materials. All other authors report no conflicts of interest.

\* E-mail: shanil.ebrahim@utoronto.ca

## Introduction

Major Depressive Disorder (henceforth referred to as depression) results in immense human suffering and is associated with considerable socioeconomic costs. Depression accounts for 11% of disability worldwide and an estimated productivity loss of \$14.4 billion annually in Canada [1,2,3,4]. The World Health Organization (WHO) estimates suggest that depression will become the second leading cause of disease burden worldwide by the year 2020 [5,6,7].

The National Institute for Health and Clinical Excellence (NICE) in the UK has recommended that health care professionals provide, alone or in combination, pharmacological treatments and

high-intensity psychological interventions for individuals suffering from moderate or severe depression. The most frequently prescribed psychotherapy for treating depression is cognitive behavioural therapy (CBT) [8,9].

Depression is a common reason for receiving disability benefits [10,11,12], incurring more costs for long-term disability (LTD) than other disorders [13]. Individuals suffering from psychiatric disorders who are also receiving disability benefits require more complex treatment and have more difficulty returning to work than those suffering from other disabling complaints [14]. Psychological therapy may be less effective, or ineffective, in patients receiving disability benefits, as their circumstances or psychological status may interfere with the successful implemen-

tation of therapy [15]. There is indirect evidence for this hypothesis from surgical populations: a recent meta-analysis of 129 studies revealed that the odds of an unsatisfactory outcome in patients receiving disability benefits or engaged in litigation was 3.79 times greater (95% confidence interval [CI]: 3.28 to 4.37) versus similar patients not in receipt of disability benefits or pursuing litigation [16].

Given that psychotherapy is one of the most frequently reimbursed treatments for depression by private insurers [17], it is important to ascertain if psychotherapy represents a worthwhile expenditure of time and energy for depressed patients, and a good investment for insurers. We recently completed a systematic review in which none of 92 randomized controlled trials (RCTs) that explored the effect of CBT on depression reported whether enrolled patients were receiving disability benefits. We successfully contacted 56 trialists and identified 3 trials that captured information on disability benefit status [18]. Our analyses consisting of 2 trials (including 34 patients on disability benefits) did not find a significant difference in depression between patients receiving disability benefits versus those not receiving disability benefits. However, we were limited by the small number of patients available for analysis.

In the present study, we used the administrative data of a large Canadian, private, disability insurer (Sun Life Financial Inc.) to explore the association between the provision of psychotherapy for patients suffering from depression and time to both short-term disability (STD) and LTD claim closure. Additionally, we evaluated what factors were associated with receipt of psychotherapy in patients with depression in receipt of disability benefits.

## Methods

### Ethics statement

The Research Ethics Board at McMaster University approved our study. The ethics board waived the need for written informed consent, as this was retrospective study where the de-identified data were analyzed anonymously.

### Design

Secondary analysis of an insurance administrative database

### Description of patients and eligibility criteria

Between January 2007 and December 2010, Sun Life Financial had 259,510 claims submitted for approval. Of these, 190,527 were STD claims and 68,983 LTD claims. An STD and LTD claim differ in regards to the potential duration of time that claimants may receive wage replacement benefits. The two most common standard benefit periods for an STD claim is up to 17 weeks and 26 weeks, but some plan benefit periods may be less or more than this duration. An LTD claim pay wage replacement benefits for a longer period, up to age 65.

Of the 259,510 filed claims at Sun Life, 172,425 (90.5%) STD and 55,530 (80.5%) LTD claims were approved. For our analyses, we included all claims (1 claim per claimant) that were approved for STD or LTD benefits with a primary diagnosis of major depressive disorder or recurrent depressive disorder. We excluded all individuals whose claims were recorded as closed prior to contractual approval, and STD claims with a maximum claim benefit period over 2.5 years as we deemed those to be data entry errors.

### Administrative Variables

The database consisted of demographic, administrative, and clinical information. The case manager(s) responsible for oversee-

ing each claim entered all data. The standard requirement is for data to be entered within 5 days of claim receipt for STD claims, and within 10 days for LTD claims, although this may vary.

Guided by the results from observational studies evaluating predictors of recovery in patients receiving disability benefits due to depression [19,20,21], and a systematic review evaluating prognostic factors of long term disability due to mental disorders [22], we selected, *a priori*, 14 variables from the database that we judged may be associated with claim closure and receipt of psychotherapy, and predicted the direction of anticipated effects. In addition to the variables we chose from previous evidence, we included and predicted the direction of anticipated effects of two additional variables (time to claim approval and disability funding policy) in our model, as per recommendations by content experts in our research team and the administrative team at Sun Life. Two psychologists, blinded to study results, provided hypotheses on the anticipated direction of effect of receipt of psychotherapy on STD and LTD claim closure. They predicted that individuals in the STD group are less likely to benefit from psychotherapy given the time taken for CBT to be successfully implemented, which may take them into the LTD timeframe. They predicted that individuals in the LTD group are more likely to benefit from psychotherapy. Further, they hypothesized that if there was a difference in the anticipated directions between the two groups, it may be due to the increased severity of illness or secondary gains in those receiving psychotherapy in the STD group. Table 1 provides a description of all independent variables considered in our models and our predictions on the anticipated direction of effect on disability claim closure.

Disability funding policies can be purchased by employers under three types of financial arrangements: non-refund policies where the insurer approves and funds services and treatments, refund policies in which the insurer and the plan sponsor (e.g., the employer) shares the funding for services and treatments, and administrative services only (ASO) policies in which the plan sponsor approves and pays for all services and treatments. For LTD claims, all types of policies require funds to be put aside (as reserves) that amount to two-thirds of the claimant's pre-disability income that would be earned from the age their long-term benefits began until the age of 65. Under a non-refund policy, the reserves are funded by the insurer, and released back to the insurer if the claim resolves. Under refund or ASO policies, the reserves for LTD claims are funded by the employer, and released back to the employer if the claim resolves. For our regression models, we used non-refund policy as the reference group.

Two authors (SE and JWB) independently grouped 66 different industries into blue-collar, grey-collar and white-collar industries (94% agreement) and reached consensus through discussion (Table S1).

### Outcomes

Our primary outcome was time to claim closure, defined as the duration from disability claim approval until the closure/resolution of the claim. Our secondary outcome was receipt of psychotherapy.

### Data management and data cleaning

We screened all data to identify outliers, inconsistencies and missing data by calculating summary statistics, and exploring distributions graphically. If clear outliers and inconsistencies were identified, we worked with Sun Life Financial to correct the data. If inconsistencies could not be corrected, we treated them as missing data. We excluded variables that were missing for more

**Table 1.** Description of variables

| Variable                              | Description                                                                                    | Anticipated direction of claim closure         |
|---------------------------------------|------------------------------------------------------------------------------------------------|------------------------------------------------|
| <i>Claimant demographic variables</i> |                                                                                                |                                                |
| Age                                   | Age of claimant at disability                                                                  | Older age: (–)                                 |
| Gender                                | Gender of claimant                                                                             | Females: (–)                                   |
| Province                              | Province the claimant resides in                                                               | Ontario, Quebec: (+)                           |
| Industry                              | Type of industry the claimant is working in (blue collar, grey collar, white collar*)          | White, grey collar: (–)                        |
| Salary                                | Salary of claimant                                                                             | Higher salary: (–)                             |
| ICD-10 Primary Diagnosis              | Primary diagnosis of claimant (major depression or recurrent depression)                       | Recurrent depression: (–)                      |
| ICD-10 secondary diagnosis            | Secondary diagnosis of claimant (none, psychological diagnosis, non-psychological diagnosis)   | Secondary diagnosis: (–)                       |
| <i>Claim coverage variables</i>       |                                                                                                |                                                |
| Time to claim registration            | Duration from claimant’s disability date to disability claim registration date                 | Longer time to claim registration: (–)         |
| Time to claim approval                | Duration from disability claim registration date to disability claim contractual approval date | Longer time to claim approval: (–)             |
| Elimination period                    | Duration from claimant’s disability date to first payment date                                 | Longer elimination period: (–)                 |
| Maximum claim benefit period          | Duration from disability claim contractual approval date to maximum claim benefit date         | Longer claim benefit period: (–)               |
| Location of claim office              | Office where the claim is currently managed (Edmonton, Montreal, Toronto, Vancouver, Waterloo) | Toronto, Montreal: (+)                         |
| Funding type                          | Funding arrangement of claim (non-refund, refund, administrative services only [ASO])          | Refund, ASO: (–)                               |
| Total reserve amount                  | Reserves held on claims (LTD only)                                                             | Higher reserves: (+)                           |
| Receipt of psychotherapy              | If claimant has received psychotherapy or not                                                  | Receipt of psychotherapy: (O for STD/+for LTD) |

ICD: International classification of diseases; +: associated with faster claim closure; –: associated with slower claim closure; O: associated with similar resolution; \* – classifications of industry in Table S1; LTD – long term disability  
doi:10.1371/journal.pone.0067162.t001

than 10% of claimants. Of the variables that were not excluded, less than 1% was missing.

**Statistical analysis**

We generated frequencies for all collected data. We reported the mean and standard deviation (SD) of continuous variables that were normally distributed, the median and interquartile range (IQR) for continuous variables that were not normally distributed (assessed through residual analysis and computing kurtosis and skewness measures [skewness and kurtosis measures of +2 to -2 considered normal]), and the number of occurrences with proportions represented as percentages for categorical variables.

We tested for collinearity to assess if a predictor was highly correlated with another (correlation coefficient  $r > 0.5$ ) using a correlation matrix. If two variables were highly correlated, we removed the variable that was considered to be of lesser importance, as guided by the administrators at Sun Life Financial and content experts on our team.

We performed a time-to-event analysis using Cox proportional hazards regression to assess the association between time to claim closure and the independent variables. Receipt of psychotherapy was treated as a time-dependent covariate to account for when it was initiated during the course of the disability claim. For STD claims that were unresolved 26 weeks after claim approval, we used 181 days (26 weeks [the more common STD benefit duration] minus 1 day) as our censoring point to maintain the proportionality assumption. For LTD claims that were unresolved when the data was extracted, we used the date of data extraction

as our censoring point. For our secondary analysis, we performed an adjusted logistic regression to assess the association between receipt of psychotherapy and potentially predictive factors. To avoid overfitting our models, we required at least 10 events per variable for our Cox regression model and 10 events of the least common outcome—receipt of psychotherapy—for our logistic regression model [23]. Our regression model excludes independent variables with less than 200 observations unless we were able to collapse them with other related variables to exceed this threshold. We calculated hazard ratios (HRs) for our time-to-event analyses and odds ratios (Ors) for our logistic regression analyses, their associated 99% confidence intervals (Cis), the unstandardized beta coefficients for each variable and the associated p-values. In order to be more stringent and minimize the likelihood of spurious findings, we considered an independent variable as statistically significant if it had a p-value of less than or equal to 0.01 in each final adjusted model.

We performed bootstrapping for our regression models to measure the accuracy of our sample estimates [24], and performed the Hosmer-Lemeshow test to assess the goodness-of-fit in our logistic regression model.

We used SPSS v20.0 to perform all statistical analyses.

**Results**

Of 13,758 STD and 11,275 LTD claims received with a primary diagnosis of depression, 3250 (24%) STD and 937 (8%) LTD claims were excluded due to the claim being declined, exceeding a claim benefit period of 2.5 years (STD only), or having

**Table 2.** Baseline characteristics

| Variables                                  | STD n(%)                  | LTD n(%)                  |
|--------------------------------------------|---------------------------|---------------------------|
| Total claimants                            | 10508                     | 10338                     |
| Claim closure reason                       |                           |                           |
| Censored at time of data extraction        | 173 (1.6%)                | 3670 (35.5%)              |
| Return to work                             | 3390 (32.3%)              | 4542 (43.9%)              |
| Anticipated return to work                 | 2900 (27.6%)              | 0 (0%)                    |
| Maximum benefit date reached               | 3003 (28.6%)              | 0 (0%)                    |
| Offsets exceed benefits                    | 4 (0.04%)                 | 8 (0.1%)                  |
| Retirement/terminal age                    | 11 (0.1%)                 | 141 (1.4%)                |
| Own occupation termination                 | 0 (0%)                    | 451 (4.4%)                |
| No longer disabled                         | 305 (2.9%)                | 1092 (10.6%)              |
| Claim transfer or settlement               | 0 (0%)                    | 57 (0.6%)                 |
| Rehabilitation settlement                  | 0 (0%)                    | 280 (2.7%)                |
| Litigation settlement                      | 0 (0%)                    | 31 (0.3%)                 |
| Other (including strike and securing info) | 715 (6.8%)                | 20 (0.2%)                 |
| Death                                      | 7 (0.1%)                  | 41 (0.4%)                 |
| Age: Mean (SD) years                       | 43.3 (10.1)               | 47.0 (9.3)                |
| Sex                                        |                           |                           |
| Male                                       | 5859 (55.8%)              | 3380 (67.3%)              |
| Female                                     | 4640 (44.2%)              | 6958 (32.7%)              |
| Salary per month: Median (IQR)             | \$3337 (\$2607 to \$4450) | \$4344 (\$3204 to \$5154) |
| Industry                                   |                           |                           |
| White-collar                               | 2502 (23.8%)              | 2904 (28.1%)              |
| Grey-collar                                | 3474 (33.1%)              | 2112 (20.4%)              |
| Blue-collar                                | 4532 (42.1%)              | 2490 (24.1%)              |
| Unknown*                                   | 0 (0%)                    | 2832 (27.4%)              |
| Primary diagnosis                          |                           |                           |
| Major depression                           | 10004 (95.2%)             | 9034 (87.4%)              |
| Recurrent depression                       | 504 (4.8%)                | 1304 (12.6%)              |
| Secondary diagnosis                        |                           |                           |
| None                                       | 8043 (76.5%)              | 6657 (64.4%)              |
| Psychological diagnosis                    | 1746 (16.6%)              | 2337 (22.6%)              |
| Nonpsychological diagnosis                 | 719 (6.8%)                | 1344 (13.0%)              |
| Province                                   |                           |                           |
| British Columbia                           | 842 (8.0%)                | 966 (9.3%)                |
| Alberta**                                  | 1736 (16.5%)              | 1112 (10.8%)              |
| Saskatchewan**                             | 237 (2.2%)                | 119 (1.2%)                |
| Manitoba**                                 | 155 (1.5%)                | 155 (1.5%)                |
| Ontario                                    | 3798 (36.1%)              | 3532 (34.2%)              |
| Quebec                                     | 2956 (28.1%)              | 3922 (37.9%)              |
| New Brunswick***                           | 105 (1.0%)                | 189 (1.8%)                |
| Nova Scotia***                             | 537 (5.1%)                | 224 (2.2%)                |
| Prince Edward Island***                    | 5 (0.05%)                 | 35 (0.3%)                 |
| Newfoundland***                            | 139 (1.3%)                | 83 (0.8%)                 |
| Claim office                               |                           |                           |
| Vancouver                                  | 507 (4.8%)                | 798 (7.7%)                |
| Edmonton                                   | 1953 (18.6%)              | 959 (9.3%)                |
| Waterloo                                   | 2702 (25.7%)              | 1534 (14.8%)              |
| Toronto                                    | 1707 (16.2%)              | 1084 (10.5%)              |
| Montreal                                   | 3639 (34.6%)              | 5963 (57.6%)              |

**Table 2. Cont.**

| Variables                                          | STD n(%)           | LTD n(%)                           |
|----------------------------------------------------|--------------------|------------------------------------|
| Funding type                                       |                    |                                    |
| ASO                                                | 4042 (38.5%)       | 645 (6.2%)                         |
| Non-Refund                                         | 3376 (32.1%)       | 4399 (42.6%)                       |
| Refund                                             | 3090 (29.4%)       | 5294 (51.2%)                       |
| Time to claim receipt months: median (IQR)         | 0.3 (0.2 to 0.6)   | 4.0 (2.8 to 5.3)                   |
| Time to claim approval months: median (IQR)        | 0.4 (0.2 to 0.7)   | 1.5 (0.9 to 2.3)                   |
| Reserve amount: median (IQR)                       | N/A                | \$283,678 (\$121,742 to \$629,813) |
| Receipt of psychotherapy                           |                    |                                    |
| No                                                 | 10247              | 8756                               |
| Yes                                                | 261                | 1582                               |
| Time to initiate psychotherapy weeks: median (IQR) | 10.1 (6.8 to 14.9) | 17.1 (8.7 to 34)                   |

STD- Short term disability; LTD- Long-term disability; SD- Standard deviation; IQR- Interquartile range;; \* - Excluded from analyses; \*\* - merged as 'Prairies' for our analyses; \*\*\* - merged as 'Maritimes' for our analyses; N/A - not applicable due to no reserves for STD  
doi:10.1371/journal.pone.0067162.t002

their claim paid retroactively. Our final analysis included 10,508 STD and 10,338 LTD claims. Depression management included psychotherapy in 261 STD claims and 1,582 LTD claims. Table 2 presents baseline characteristics of all factors for STD and LTD claims.

We excluded the following variables from our regression models: total reserve amount for STD model as there are no reserves put aside for STD claims; claim office due to high correlation with province of residence; time to receipt of disability benefits and elimination period (date of disability to the date the claim was first paid) due to high correlation with time to claim approval; and type of employment industry from our LTD models due to a high frequency (27.4%) of missing data. Due to small numbers of observations from some provinces, we merged Prince Edward Island, Newfoundland, Nova Scotia and New Brunswick into one category, "Maritimes", and Alberta, Saskatchewan and Manitoba into "Prairies". We excluded Yukon and Northwest

Territories as they had fewer than 200 observations and merging them with other provinces was not considered appropriate.

**Short-term disability**

Of 10,508 STD claims due to depression, 10,335 (98.4%) were closed prior to a maximum STD benefit duration of 26 weeks and 173 (1.6%) were censored. Of the 10,335 closed claims, 3390 (32.8%) returned to work and 2900 (28.1%) were expected to return to work (Table 2).

Figure 1 presents the time to closure survival curve for STD claimants.

**Factors associated with time to STD claim closure.** Our adjusted regression analysis showed that psychotherapy was associated with longer time to STD claim closure (HR [99% CI] = 0.81 [0.68 to 0.97]). Older age (0.90 [0.88 to 0.92], per decade), female gender (0.92 [0.87 to 0.97]), working in a white-collar industry (0.86 [0.80 to 0.92]), higher salary (0.87 [0.82 to 0.93]), a primary diagnosis of recurrent depression versus non-recurrent major depression (0.78 [0.69 to 0.87]), a psychological secondary diagnosis (0.90 [0.84 to 0.97]) or a non-psychological secondary diagnosis (0.81 [0.73 to 0.90]), a longer maximum claim benefit period duration (0.87 [0.86 to 0.88]), and an administrative services only (ASO) ([0.94 [0.88 to 1.00]) or refund policy (0.86 [0.80 to 0.92]) compared to non-refund policy claims, and residing in Quebec compared to Ontario (0.73 [0.68 to 0.78]) were independently associated with slower STD claim closure (Table 3).

Longer time from claim registration to claim approval (1.11 [1.07 to 1.15]), and residing in the Prairies (1.08 [1.00 to 1.16]) or the Maritimes (1.19 [1.07 to 1.32]) compared to Ontario were associated with faster STD claim closure (Table 3).

**Factors predictive of receipt of psychotherapy among STD claims.** Working in a white-collar industry (OR [99% CI] = 2.59 [1.64 to 4.08]) or a grey-collar industry (1.99 [1.27 to 3.13]) compared to a blue-collar industry, and a refund policy compared to a non-refund policy claim (1.58 [1.05 to 2.38]) were associated with a higher likelihood of receiving psychotherapy while in receipt of STD benefits.

**Long-term disability**

Of 10,338 LTD claims due to depression, 6668 (65%) were closed and 3670 (35%) were censored when our data was

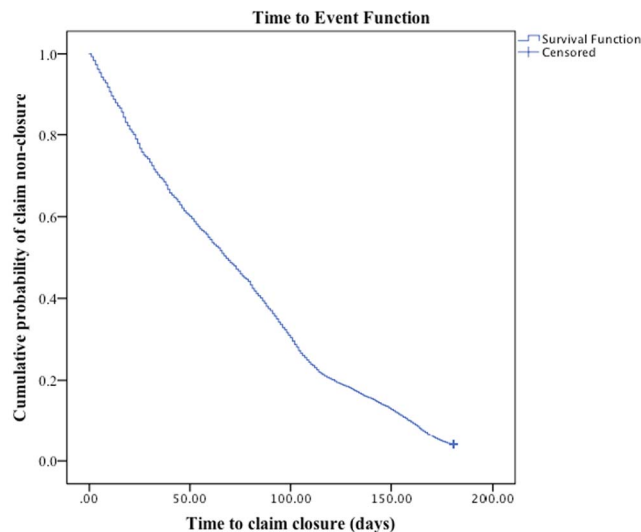

**Figure 1. Kaplan Meier time to event curve of time to short-term disability claim closure**  
doi:10.1371/journal.pone.0067162.g001

**Table 3.** Factors predictive of time to short-term disability claim closure

| Factor                             | p-value | HR    | 99.0% CI for HR |       |
|------------------------------------|---------|-------|-----------------|-------|
|                                    |         |       | Lower           | Upper |
| Receipt of psychotherapy           | .002    | .813  | .684            | 0.966 |
| Age (per 10 years)                 | <.001   | .902  | .878            | .926  |
| Gender                             |         |       |                 |       |
| Female                             | <.001   | .915  | .865            | .968  |
| Male (reference group)             |         | 1     |                 |       |
| Industry                           |         |       |                 |       |
| White collar                       | <.001   | .848  | .790            | .911  |
| Grey collar                        | .013    | .941  | .884            | 1.002 |
| Blue collar (reference group)      |         | 1     |                 |       |
| Salary (per \$1000 per week)       | <.001   | .872  | .815            | .934  |
| ICD-10 primary diagnosis           |         |       |                 |       |
| Major depression (reference group) |         | 1     |                 |       |
| Recurrent depression               | <.001   | .776  | .687            | .876  |
| ICD-10 secondary diagnosis         |         |       |                 |       |
| Psychological diagnosis            | <.001   | .904  | .842            | .971  |
| Non-Psychological diagnosis        | <.001   | .814  | .733            | .904  |
| None (reference group)             |         | 1     |                 |       |
| Time to approval (months)          | <.001   | 1.105 | 1.065           | 1.147 |
| Maximum benefit period (months)    | <.001   | .870  | .859            | .881  |
| Province                           |         |       |                 |       |
| British Columbia                   | .434    | 1.031 | .931            | 1.142 |
| Prairies*                          | .010    | 1.077 | 1.000           | 1.160 |
| Quebec                             | <.001   | .713  | .666            | .764  |
| Maritimes**                        | <.001   | 1.188 | 1.068           | 1.320 |
| Ontario (reference group)          |         | 1     |                 |       |
| Funding type                       |         |       |                 |       |
| ASO                                | .010    | .939  | .881            | 1.000 |
| Refund                             | <.001   | .855  | .798            | .915  |
| Non-refund (reference group)       |         | 1     |                 |       |

HR – hazard ratio; CI – confidence interval; ICD-10 – International Classification of Diseases version 10; \* - Consists of Alberta, Saskatchewan, and Manitoba; \*\* - Consists of New Brunswick, Newfoundland, Nova Scotia and Prince Edward Island; ASO – Administrative Services Only  
 Factors that have a p-value of less than 0.01 are significant predictors of claim closure  
 An HR of greater than 1 is associated with faster claim closure; an HR of less than 1 is associated with slower claim closure  
 doi:10.1371/journal.pone.0067162.t003

captured. Of the 6668 closed claims, 4542 (68.1%) returned to work (Table 2).

Figure 2 presents the time to closure survival curve for LTD claimants.

**Factors predictive of time to claim closure.** Our adjusted regression analysis showed that receipt of psychotherapy (HR [99% CI] = 1.42 [1.30 to 1.55]) was independently associated with faster claim closure. Older age (0.83 [0.80 to 0.85]), a primary diagnosis of recurrent depression (0.80 [0.72 to 0.89]), a psychological secondary diagnosis (0.66 [0.61 to 0.71]) or non-psychological secondary diagnosis (0.77 [0.71 to 0.83]), longer time from claim registration to claim approval (0.98 [0.96 to 0.997]), and ASO (0.87 [0.75 to 0.996]) or refund (0.73 [0.68 to

0.78]) policy claims compared to non-refund policy claims were associated with slower claim closure.

Residing in the Prairies (1.46 [1.31 to 1.61]) or Quebec (1.93 [1.78 to 2.09]) versus Ontario were associated with faster claim closure (Table 4).

**Factors predictive of receipt of psychotherapy among LTD claims.** Older age (OR [99% CI] = 0.90 [0.83 to 0.97]), a non-psychological secondary diagnosis (0.78 [0.62 to 0.98]), residing in Quebec compared to Ontario (0.53 [0.44 to 0.64]), and an ASO (0.58 [0.42 to 0.80]) or refund (0.70 [0.60 to 0.82]) policy claims compared to non-refund were associated with a lower likelihood of receiving psychotherapy. Females versus males (1.20 [1.02 to 1.41]), and residing in the prairies versus Ontario (1.32 [1.08 to 1.62]) were associated with a higher likelihood of receiving psychotherapy.

Table 5 provides a summary of factors that were independently associated with time to STD and LTD claim closure compared to our anticipated direction of effect.

## Discussion

### Summary of main results

Our study, evaluating the effect of psychotherapy on disability benefit claim closure in patients suffering from a primary diagnosis of depression, found that receipt of psychotherapy was associated with longer time to STD closure and faster LTD claim closure. For STD and LTD claims, older age, a primary diagnosis of recurrent depression (compared to major depression), a secondary psychological or non-psychological diagnosis (versus no secondary diagnosis), and an administrative services only or a refund policy (compared to a non-refund policy) were commonly predictive of slower claim closure. We found no common predictors that were independently associated with receipt of psychotherapy for both STD and LTD claims.

### Strengths and limitations

The strengths of our study included *a priori* creation of regression models and the anticipated direction of included independent variables. Other strengths include limited missing data, correction of identifiable data errors and inconsistencies, and validation

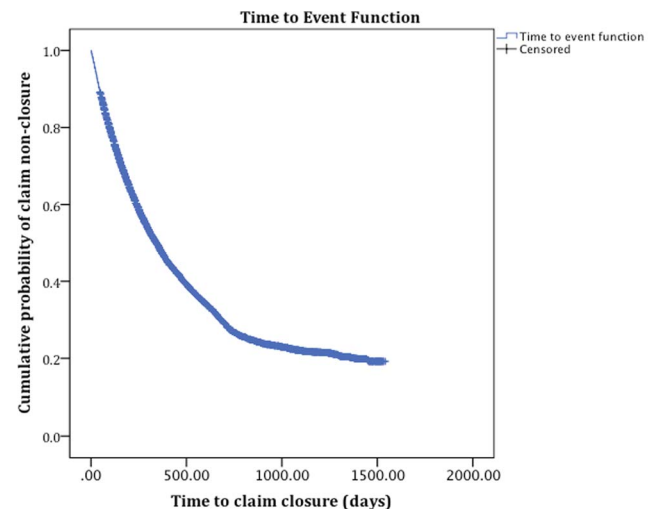

**Figure 2.** Kaplan Meier time to event curve of time to long-term disability claim closure  
 doi:10.1371/journal.pone.0067162.g002



**Table 4.** Factors predictive of time to long-term disability claim closure

|                                    | p-value | HR    | 99.0% CI for HR |       |
|------------------------------------|---------|-------|-----------------|-------|
|                                    |         |       | Lower           | Upper |
| Receipt of psychotherapy           | <.001   | 1.417 | 1.297           | 1.547 |
| Age (per 10 years)                 | <.001   | .825  | .797            | .854  |
| Gender                             |         |       |                 |       |
| Female                             | .091    | .956  | .892            | 1.024 |
| Male (reference group)             |         | 1     |                 |       |
| Salary (per \$1000 per week)       | .278    | 1.076 | .904            | 1.280 |
| ICD-10 primary diagnosis           |         |       |                 |       |
| Major depression (reference group) |         | 1     |                 |       |
| Recurrent depression               | <.001   | .803  | .724            | .891  |
| ICD-10 secondary diagnosis         |         |       |                 |       |
| Psychological diagnosis            | <.001   | .765  | .705            | .830  |
| Non-psychological diagnosis        | <.001   | .659  | .594            | .732  |
| None (reference group)             |         | 1     |                 |       |
| Time to approval (months)          | .003    | .978  | .959            | .997  |
| Province                           |         |       |                 |       |
| British Columbia                   | .197    | .937  | .823            | 1.067 |
| Prairies*                          | <.001   | 1.455 | 1.313           | 1.611 |
| Quebec                             | <.001   | 1.928 | 1.782           | 2.086 |
| Maritimes**                        | .613    | .968  | .820            | 1.143 |
| Ontario (reference group)          |         | 1     |                 |       |
| Funding type                       |         |       |                 |       |
| ASO                                | .008    | .866  | .754            | .996  |
| Refund                             | <.001   | .729  | .681            | .780  |
| Non-refund (reference group)       |         | 1     |                 |       |

HR – hazard ratio; CI –confidence interval; ICD-10 – International Classification of Diseases version 10; \* - Consists of Alberta, Saskatchewan, and Manitoba; \*\* - Consists of New Brunswick, Newfoundland, Nova Scotia and Prince Edward Island; ASO – Administrative Services Only  
 Factors that have a p-value of less than 0.01 are significant predictors of claim closure  
 An HR of greater than 1 is associated with faster claim closure; an HR of less than 1 is associated with slower claim closure  
 doi:10.1371/journal.pone.0067162.t004

checks to ensure the accuracy of our sample estimates from our regression models.

Our study has several limitations. First, this was a retrospective cohort study in which the reasons for administering psychotherapy are uncertain. Thus, despite our adjusted models, it remains possible that selection bias affected our findings; STD claimants who received psychotherapy were less likely to resolve their claims and LTD claimants chosen to receive psychotherapy were more likely to resolve their claims irrespective of the intervention. Second, a number of variables that may be important to consider were unavailable (e.g., baseline severity of depression, patient expectations regarding recovery, and the use of antidepressants), and some variables were not optimally collected. For example, all psychotherapies were categorized as an aggregate variable and the specific type of psychotherapy provided was not available, although the insurer felt that majority of psychotherapy administered was CBT. Third, our association between psychotherapy and longer time to STD claim closure may represent a misleading finding: the effects of some common forms of psychotherapy (e.g.,

CBT) typically take months [i.e., greater than 3 months] to manifest [25], meaning that even an effective therapy may not show an effect during the limited time that an STD claim is paid out. Further, it is possible that those receiving psychotherapy in the STD group had more severe depression or may have been motivated by secondary financial gains (e.g., being approved for LTD benefits). Finally, our primary outcome, claim closure, reflects to only a limited extent the more important outcome of sustained return to work [26].

**Findings in context with previous evidence**

The association between receipt of psychotherapy and claim closure or return to work has received limited attention in the published literature. However, a recent article reported the effectiveness of a pilot vocationally oriented CBT in assisting very long-term unemployed individuals return to work [27], and a recent RCT reported that individuals treated with work-focused CBT returned to work on average 65 days earlier than those receiving traditional CBT [28].

Our findings are consistent with previous evidence that shows that older age [22,29,30,31], higher salary [29], and comorbidities (presence of secondary diagnoses) are associated with worse recovery [31,32]. We found inconsistent association of female gender with claim closure between STD and LTD claims. Previous evidence is also inconsistent with a recent review finding no significant association [22] and two other reviews finding female gender as a significant predictor of longer duration of sick leave [29,33]. Differences in the results may be explained by the different conditions studied and/or adjusting for different prognostic factors in the regression models.

We found that longer claim approval time was associated with longer time to LTD claim closure but faster STD claim closure, and ASO or refund policies were associated with longer time to claim closure in both STD and LTD claims. These associations had not been previously reported. Longer approval times for LTD claims may delay treatment initiation, which potentially delays recovery (and claim closure). Although we found an opposite association for STD claims, STD approval times were found to be relatively short (median (interquartile range [IQR]) of 0.4 [0.2 to 0.7] months) compared to LTD approval times (1.5 [0.9 to 2.3] months), and thus this may not represent an important effect.

The association of ASO or refund policies with delayed recovery may be explained by differences in the amount of rehabilitation services provided. For example, among LTD claims, we found that non-refund policies were significantly more likely to receive psychotherapy than other policy types: 13% of claimants with ASO and refund policies received psychotherapy compared to 18% of claimants with a non-refund policy. In our model, we were only able to adjust for psychotherapy and there could be differences in other services (e.g., work hardening program) provided between the policy types. These findings warrant further exploration.

Although we did not predict that the Prairies region would have faster claim closure in both STD and LTD claims and Quebec would have faster claim closure in LTD claims (compared to Ontario), post-hoc discussions with insurance administrators suggested that these associations may be explained by the economic growth in the Prairies region. These discussions also suggested that greater number of mental health claims treated in Quebec may have resulted in a more established infrastructure facilitating claim resolution. However, we are uncertain as to why the same effect of faster claim closure in Quebec was not illustrated for STD claims.

**Table 5.** Comparison between predictors associated with time to claim closure for short-term disability versus long-term disability claims

| Predictors associated with time to claim closure                | STD | LTD  | Anticipated direction |
|-----------------------------------------------------------------|-----|------|-----------------------|
| <b>Receipt of psychotherapy</b>                                 | –   | +    | O/+                   |
| Older age                                                       | –   | –    | –                     |
| Female (compared to males)                                      | –   | NS*  | –                     |
| White collar industry (compared to blue collar industry)        | –   | N/A  | –                     |
| Grey collar industry (compared to blue collar industry)         | NS* | N/A  | –                     |
| Higher salary                                                   | –   | NS** | –                     |
| Recurrent depression (compared to major depression)             | –   | –    | –                     |
| Secondary psychological diagnosis (compared to no diagnosis)    | –   | –    | –                     |
| Secondary nonpsychological diagnosis (compared to no diagnosis) | –   | –    | –                     |
| Longer maximum benefit period duration                          | –   | N/A  | –                     |
| <b>Longer time from claim registration to claim approval</b>    | +   | –    | –                     |
| <b>Prairies (compared to Ontario)</b>                           | +   | +    | –                     |
| <b>Quebec (compared to Ontario)</b>                             | –   | +    | O                     |
| <b>Maritimes (compared to Ontario)</b>                          | +   | NS*  | –                     |
| ASO funding (compared to non-refund)                            | –   | –    | –                     |
| Refund funding (compared to non-refund)                         | –   | –    | –                     |

Bold rows represent associations that were in the opposite directions of what we anticipated  
 STD: short-term disability; LTD: long-term disability; +: associated with faster claim closure; -: associated with slower claim closure; O: associated with similar resolution;  
 NS\*: not significant but consistent with anticipated direction; NS\*\*: not significant and not consistent with anticipated direction; N/A = not included in the model  
 doi:10.1371/journal.pone.0067162.t005

**Future directions**

Our findings reveal uncertainty about the true effect of psychotherapy on time to claim resolution, among patients with depression. A prospective study with careful measurement of all putative determinants of claim resolution would strengthen the evidence; a randomized controlled trial could settle the issue definitively. Such research is required before payers and clinicians can confidently decide whether they should decrease, continue or expand the use of psychotherapy in managing these patients.

**Conclusions**

Our study found, paradoxically, that receipt of psychotherapy is significantly associated with longer time to claim closure in individuals receiving STD, and faster claim closure in patients receiving LTD. We also found evidence to suggest that age, presence and type of diagnoses, type of policy funding, gender, salary, industry, time to claim approval and province claimants reside in are predictive of claim closure. Establishing the causal

effect of psychotherapy on claim resolution will require well-designed prospective studies.

**Supporting Information**

**Table S1** Classification of industry (DOC)

**Acknowledgments**

We thank Drs. Peter Bieling and Randi McCabe for their assistance in developing hypotheses for our study, and Mr. Cory Williams for helpful discussions regarding the Sun Life administrative database.

**Author Contributions**

Conceived and designed the experiments: SE GHG SDW JWB. Performed the experiments: SE GHG SDW DHA SEH JWB. Analyzed the data: SE SDW DHA. Contributed reagents/materials/analysis tools: MB IPS. Wrote the paper: SE. Reviewed manuscript critically: GHG SDW DHA MB SEH IPS JWB.

**References**

- Lim K, Jacobs P, Ohinmaa A, Schopflocher D, Dewa CS (2008) A new population-based measure of the economic burden of mental illness in Canada. *Chronic Dis Can* 28: 92–98.
- Hirschfeld R, Montgomery SA, Keller MB, Kasper S, Schatzberg AF, et al. (2000) Social functioning in depression: a review. *J Clin Psychiatry* 61: 268–275.
- Moore R, Mao Y, Zhang J, Clarke K, Laboratory Centre for Disease Control (1997) Economic Burden of Illness in Canada. Ottawa: Health Canada. 102 p.
- Stephens T, Joubert N (2001) The economic burden of mental problems in Canada. *Chronic Dis Can* 22: 1–10.
- Brown P (2001) Effective treatments for mental illness not being used, WHO says. *BMJ* 323: 769.
- Mor N, Haran D (2009) Cognitive-behavioral therapy for depression. *Isr J Psychiatry Relat Sci* 46: 269–273.
- World Health Organization (WHO) (2002) Mental Health: New understanding, New hope. Geneva: WHO. 169 p.
- Dobson KS (2001) Handbook of cognitive-behavioral therapies. 2nd Edition. New York; London: Guilford Press. 481 p.
- NICE (2009) Depression: Treatment management of depression in adults. London: National Institute for Clinical Excellence. 67 p.
- Kouzis AC (2000) Psychopathology and the initiation of disability payments. *Psychiatr Serv* 51: 908–913.
- Kouzis AC, Eaton WW (1994) Emotional disability: prevalence and predictors. *Am J Public Health* 84: 1304–1307.
- Kouzis AC, Eaton WW (1997) Psychopathology and the development of disability. *Soc Psychiatry Psychiatr Epidemiol* 32: 379–386.
- Salkever DS, Goldman H, Purushothaman M, Shinogle J (2000) Disability management, employee health and fringe benefits, and long-term-disability claims for mental disorders: an empirical exploration. *Milbank Q* 78: 79–113.



14. Dewa C, Hoch JS, Goering P, Lin E, Paterson M (2003) Use of antidepressants among Canadian workers receiving depression-related short-term disability benefits. *Psychiatr Serv* 54: 724–729.
15. Leahy RL (2003) *Roadblocks in Cognitive-Behavioral Therapy: Transforming Challenges into Opportunities for Change*. New York: The Guilford Press. 364 p.
16. Harris I, Mulford J, Solomon M, van Gelder JM, Young J. (2005) Association between compensation status and outcome after surgery: a meta-analysis. *JAMA* 293: 1644–1652.
17. Bellman M (2010) Effectiveness of CBT on individuals receiving disability benefits. Personal communication. Toronto.
18. Ebrahim S, Montoya L, Truong W, Hsu S, Kamal el Din M, et al. (2012) Effectiveness of Cognitive Behavioral Therapy for depression in patients receiving disability benefits: A systematic review and individual patient meta-analysis. *PLoS ONE* 7: e50202.
19. Kronstrom K, Karlsson H, Nabi H, Oksanen T, Salo P, et al. (2011) Optimism and pessimism as predictors of work disability with a diagnosis of depression: A prospective cohort study of onset and recovery. *J Affect Disorder* 130: 294–299.
20. Nielson MBD, Madsen IEH, Bultmann U, Christensen U, Diderichsen F, et al. (2010) Predictors of return to work in employees sick-listed with mental health problems: findings from a longitudinal study. *Eur J Public Health* 21: 806–811.
21. Romero CC, Sierra MC, Gutierrez JCS, Barrenechea Albarran JL, et al. (2011) Variables moduladoras de la discapacidad asociada al trastorno depresivo. *Rev Calid Asist* 26: 39–46.
22. Cornelius LR, van der Klink JJ, Groothoff JW, Brouwer S (2011) Prognostic factors of long term disability due to mental disorders: a systematic review. *J Occup Rehabil* 21: 259–274.
23. Norman G, Streiner S (2008) *Biostatistics: The bare essentials*. Shelton, Connecticut: People's Medical Publishing House. 393 p.
24. Steyerberg EW, Harrell FE, Jr, Borsboom GJ, Eikemans MJ, Vergouwe Y, et al. (2001) Internal validation of predictive models: efficiency of some procedures for logistic regression analysis. *J Clin Epidemiol* 54: 774–781.
25. Hunter MS, Ussher JM, Browne SJ, Cariss M, Jolley R, et al. (2002) A randomized comparison of psychological (cognitive behavior therapy), medical (fluoxetine) and combined treatment for women with premenstrual dysphoric disorder. *J Psychosom Obstet Gynaecol* 23: 193–199.
26. Steenstra IA, Lee H, de Vroome EM, Busse JW, Hogg-Johnson SJ (2012) Comparing Current Definitions of Return to Work: A Measurement Approach. *J Occup Rehabil* 22: 394–400.
27. Rose VK, Perz J, Harris E (2012) Vocationally oriented cognitive behavioural training for the very long-term unemployed. *Occup Med (Lond)* 62: 298–300.
28. Lagerveld SE, Blonk RW, Brenninkmeijer V, Wijngaards-de Meij L, Schaufeli WB (2012) Work-focused treatment of common mental disorders and return to work: a comparative outcome study. *J Occup Health Psychol* 17: 220–234.
29. Steenstra IA, Verbeek JH, Heymans MW, Bongers PM (2005) Prognostic factors for duration of sick leave in patients sick listed with acute low back pain: a systematic review of the literature. *Occup Environ Med* 62: 851–860.
30. Dekkers-Sánchez PM, Hoving JL, Sluiter JK, Frings-Dresen MH (2008) Factors associated with long-term sick leave in sick-listed employees: a systematic review. *Occup Environ Med* 65: 153–157.
31. Blank L, Peters J, Pickvance S, Wilford J, Macdonald E (2008) A Systematic Review of the Factors which Predict Return to Work for People Suffering Episodes of Poor Mental Health. *J Occup Rehabil* 18: 27–34.
32. Werner EL, Cote P (2009) Low back pain and determinants of sickness absence. *Eur J Gen Pract* 15: 74–79.
33. Detaille S, Heerkens YF, Engels JA, van der Gulden JW, van Dijk FJ (2009) Common prognostic factors of work disability among employees with a chronic somatic disease: a systematic review of cohort studies. *Scan J Work Environ Health* 35: 261–281.
